# Supplementary material for: Sponge-like N-doped carbon materials with Co-based nanoparticles derived from biomass as highly efficient electrocatalysts for the oxygen reduction reaction in alkaline media
Source: Royal Society of Chemistry journal article supplement (doi:10.1039/c8ra10462j), 2019-01-01
Supplement: c8ra10462j1.pdf [file c8ra10462j1.pdf]

# Electronic Supplementary Material (ESI) for RSC Advances

## Sponge-like N-doped Carbon Materials with Co-based Nanoparticles Derived from Biomass as High Efficient Electrocatalysts for Oxygen Reduction Reaction in Alkaline Media

Guolong Lu<sup>1,\*</sup>, Zhiyuan Li<sup>1</sup>, Wenxuan Fan<sup>1</sup>, Mi Wang<sup>1,2</sup>, Shuchen Yang<sup>2</sup>, Jiayi Li<sup>1</sup>,  
Zhiyong Chang<sup>1</sup>, Hang Sun<sup>1</sup>, Song Liang<sup>1</sup> and Zhenning Liu<sup>1</sup>

1. Key Laboratory of Bionic Engineering (Ministry of Education), College of Biological and  
Agricultural Engineering, Jilin University, Changchun, Jilin Province, 130022, P. R. China

2. College of Engineering, Changchun Normal University

Corresponding author:

\* E-mail: Guolong Lu, Guolonglu@jlu.edu.cn

### Tables and Figures

|            |                                                                                                        |
|------------|--------------------------------------------------------------------------------------------------------|
| Figure S1  | TEM images of ASS and CoASS                                                                            |
| Figure S2  | The average size and size distribution of CoO nanoparticles.                                           |
| Figure S3  | XRD curves of SS, ASS, NASS, CoASS and CoNASS                                                          |
| Figure S4. | The XPS spectra of the catalysts                                                                       |
| Figure S5  | The EDS of CoNASS catalyst                                                                             |
| Figure S6  | The linear sweep voltammetry curves of Pt/C at different rotating speeds.                              |
| Table S1   | I <sub>D</sub> /I <sub>G</sub> ratio, element content, and nitrogen species analysis of the catalysts. |

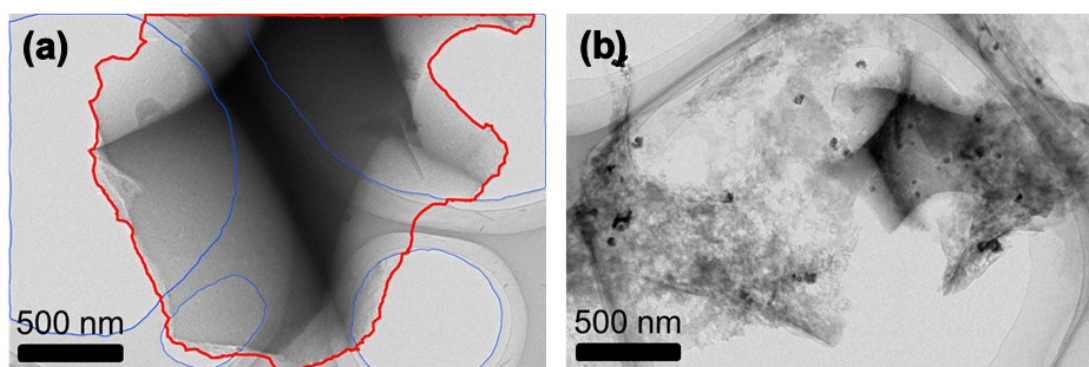

**Figure S1.** TEM images of ASS and CoASS (a-b), respectively. The sample is in the red circle and the substrate is in the position enclosed by the blue line.

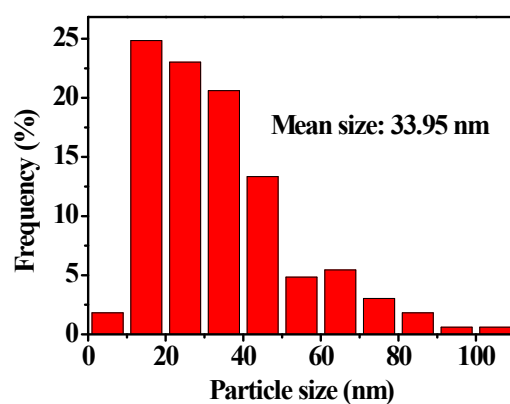

**Figure S2.** The average size and size distribution of CoO nanoparticles.

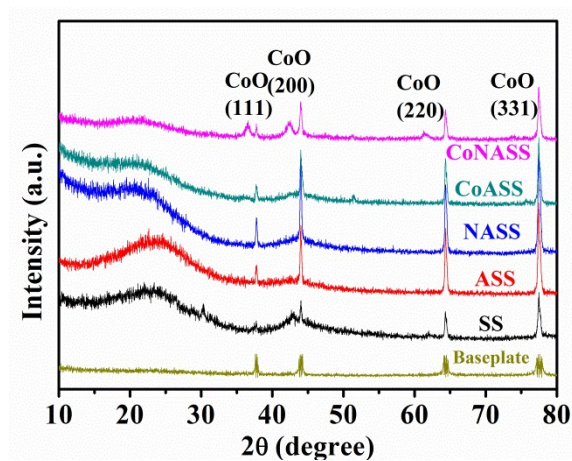

**Figure S3.** XRD curves of SS, ASS, NASS, CoASS and CoNASS (a-b), respectively

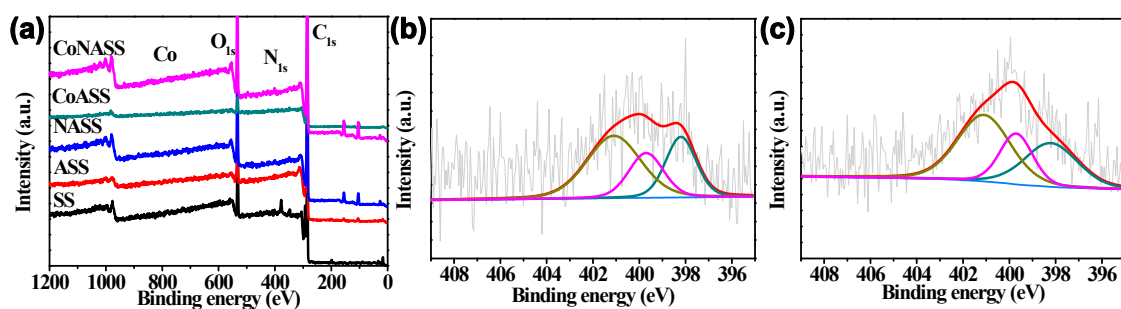

**Figure S4.** Full-survey XPS spectra (a), the high-resolution N<sub>1s</sub> spectra of NASS and CoNASS (b-c), respectively

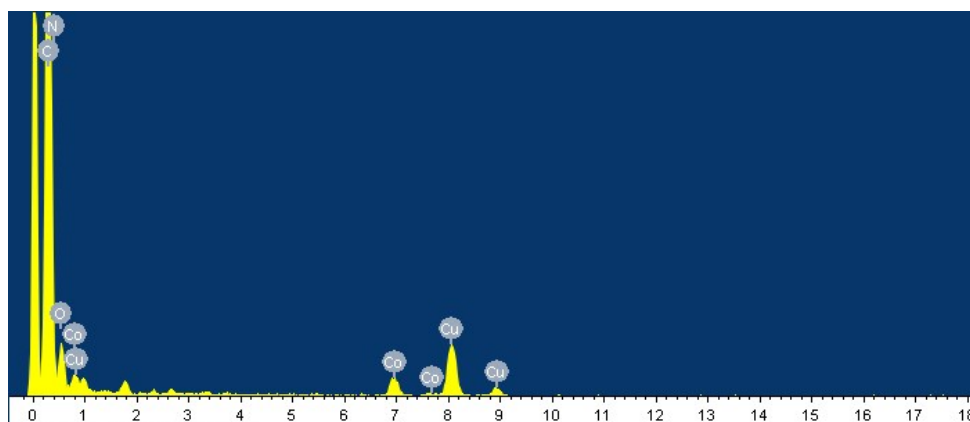

**Figure S5.** The EDS of CoNASS catalyst.

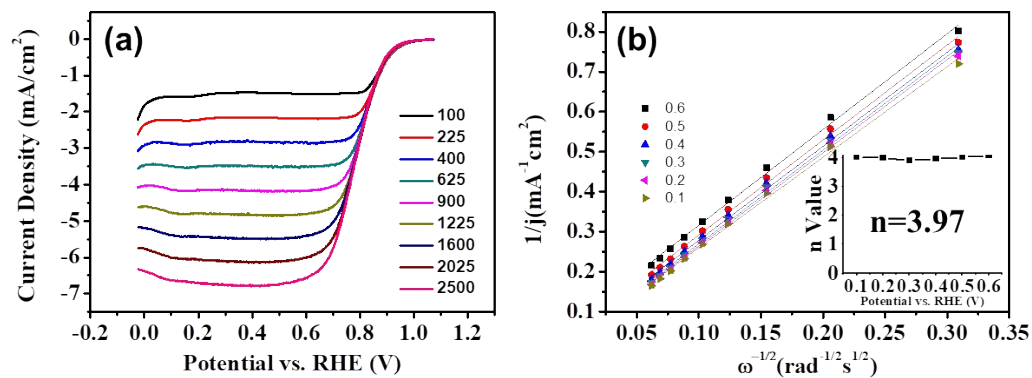

**Figure S6.** The LSV curves of Pt/C at the rotating speeds of 100, 225, 400, 625, 900, 1225, 1600, 2025 and 2500 rpm (a). The corresponding K-L plots (b) and  $n$  (inset).

**Table S1** I<sub>D</sub>/I<sub>G</sub> ratio, element content, and nitrogen species analysis of the catalysts.

| Catalysts | I <sub>D</sub> /I <sub>G</sub> | at. %   |         |         |          | Pyridinic-N | Pyrrolic-N | Graphitic-N |
|-----------|--------------------------------|---------|---------|---------|----------|-------------|------------|-------------|
|           |                                | C (at%) | O (at%) | N (at%) | Co (at%) |             |            |             |
| SS        | 1.00                           | 72.12%  | 27.88%  | 0       | 0        |             |            |             |
| ASS       | 1.03                           | 77.58%  | 21.10%  | 0       | 0        |             |            |             |
| NASS      | 1.06                           | 61.58%  | 36.29%  | 2.13%   | 0        | 27.34%      | 22.96%     | 49.70%      |
| CoASS     | 1.05                           | 86.17%  | 11.53%  | 0       | 2.30%    |             |            |             |
| CoNASS    | 1.18                           | 58.59%  | 36.78%  | 1.92%   | 2.71%    | 30.81%      | 22.31%     | 46.88%      |
